# Supplementary material
Source: MDPI journal article supplement (https://www.mdpi.com/2311-5637/10/1/67)
Supplement: s1 [file s1]

# Fine-tuning the expression of glycolate biosynthetic pathway in *Escherichia coli* using synthetic promoters

Mei Zhao <sup>1, †, \*</sup>, Jie Shang <sup>1, †</sup>, Jiaojiao Chen <sup>1, †</sup>, Hossain M. Zayed <sup>2</sup>, Xianghui Qi <sup>1,2, \*</sup>

<sup>1</sup> School of Food and Biological Engineering, Jiangsu University, 301 Xuefu Road, Zhenjiang 212013, China

<sup>2</sup> School of Life Sciences, Guangzhou University, 230 Wai Huan Xi Road, Guangzhou 510006, China

\* Correspondence: meizhao@ujs.edu.cn (M.Z.); qxh@ujs.edu.cn (X.Q.)

<sup>†</sup> These authors contributed equally to this work.

**Table S1 Strains and plasmids used in this study**

| <b>Name</b>    | <b>Relevant genotype</b>                                            | <b>Reference</b> |
|----------------|---------------------------------------------------------------------|------------------|
| <b>Strains</b> |                                                                     |                  |
| JM109          | For plasmid construction                                            | Invitrogen       |
| MG1655         | <i>E. coli</i> K12 wild type, for expressing genes                  | Invitrogen       |
| Mgly4          | MG1655(DE3) $\Delta$ ldhA $\Delta$ glcB $\Delta$ aceB $\Delta$ aldA | [14]             |
| Mgly43         | Mgly4 carrying pJNU-3                                               | This study       |
| Mgly434        | Mgly4 carrying pJNU-3 and pJNU-4                                    | [14]             |
| Mgly45         | Mgly4 carrying pTrc-aceA-ycdw                                       | This study       |
| Mgly454        | Mgly4 carrying pTrc-aceA-ycdw and pJNU-4                            | This study       |
| Mgly4T         | Mgly4 carrying pGly-2                                               | This study       |
| Mgly4T4        | Mgly4 carrying pGly-2 and pJNU-4                                    | This study       |
| MTet           | MG1655 carrying pTet-sfGFP, Amp <sup>R</sup>                        | This study       |
| ML3153         | MG1655 carrying pL3153-sfGFP, Amp <sup>R</sup>                      | This study       |
| ML3429         | MG1655 carrying pL3429-sfGFP, Amp <sup>R</sup>                      | This study       |
| ML1562         | MG1655 carrying pL1562-sfGFP, Amp <sup>R</sup>                      | This study       |
| ML3262         | MG1655 carrying pL3262-sfGFP, Amp <sup>R</sup>                      | This study       |
| ML2353         | MG1655 carrying pL2353-sfGFP, Amp <sup>R</sup>                      | This study       |
| ML3090         | MG1655 carrying pL3090-sfGFP, Amp <sup>R</sup>                      | This study       |
| ML2917         | MG1655 carrying pL2917-sfGFP, Amp <sup>R</sup>                      | This study       |
| ML3149         | MG1655 carrying pL3149-sfGFP, Amp <sup>R</sup>                      | This study       |
| ML3195         | MG1655 carrying pL3195-sfGFP, Amp <sup>R</sup>                      | This study       |
| ML2538         | MG1655 carrying pL2538-sfGFP, Amp <sup>R</sup>                      | This study       |
| ML1993         | MG1655 carrying pL1993-sfGFP, Amp <sup>R</sup>                      | This study       |

|                   |                                                                            |            |
|-------------------|----------------------------------------------------------------------------|------------|
| Mrep1(Mgly4T3429) | Mgly4 carrying pRep1, PL3429 promoter                                      | This study |
| Mrep2             | Mgly4 carrying pRep2, PL3429 promoter                                      | This study |
| Mrep3             | Mgly4 carrying pRep3, PL3429 promoter                                      | This study |
| Mgly4T3153        | Mgly4 carrying pGly3153                                                    | This study |
| Mgly4T3429        | Mgly4 carrying pGly3429                                                    | This study |
| Mgly4T1562        | Mgly4 carrying pGly1562                                                    | This study |
| Mgly4T3262        | Mgly4 carrying pGly3262                                                    | This study |
| Mgly4T2353        | Mgly4 carrying pGly2353                                                    | This study |
| Mgly4T3090        | Mgly4 carrying pGly3090                                                    | This study |
| Mgly4T2917        | Mgly4 carrying pGly2917                                                    | This study |
| Mgly4T3149        | Mgly4 carrying pGly3149                                                    | This study |
| Mgly4T3195        | Mgly4 carrying pGly3195                                                    | This study |
| Mgly4T2538        | Mgly4 carrying pGly2538                                                    | This study |
| Mgly4T1993        | Mgly4 carrying pGly1993                                                    | This study |
| <b>Plasmids</b>   |                                                                            |            |
| pGly-2            | pHHD01K harboring ycdW-aceA-aceK, p15 ori, tetR, Ptet, Kan <sup>R</sup>    | [27]       |
| pJNU-3            | pTrc99a harboring ycdw-aceA-aceK from pGly-2, Amp <sup>R</sup>             | [14]       |
| pJNU-4            | pCDFDuet-1 harboring gltA from <i>E. coli</i> , Strep <sup>R</sup>         | [14]       |
| pTrc-aceA-ycdw    | pTrc99a harboring aceA-ycdw from <i>E. coli</i> , Amp <sup>R</sup>         | [28]       |
| pL0-sfGFP         | pTrc99a harboring the sfGFP from pJKR-H, no trc promoter, Amp <sup>R</sup> | [25]       |
| pTet-sfGFP        | pL0-sfGFP harboring Tet promoter, Amp <sup>R</sup>                         | This study |
| pL3429-sfGFP      | pL0-sfGFP harboring PL3429 promoter, Amp <sup>R</sup>                      | [25]       |
| pL3429-sfGFP      | pL0-sfGFP harboring PL3429 promoter, Amp <sup>R</sup>                      | [25]       |

|              |                                                                                          |            |
|--------------|------------------------------------------------------------------------------------------|------------|
| pL3429-sfGFP | pL0-sfGFP harboring PL3429 promoter, Amp <sup>R</sup>                                    | [25]       |
| pL3429-sfGFP | pL0-sfGFP harboring PL3429 promoter, Amp <sup>R</sup>                                    | [25]       |
| pL3429-sfGFP | pL0-sfGFP harboring PL3429 promoter, Amp <sup>R</sup>                                    | [25]       |
| pL3429-sfGFP | pL0-sfGFP harboring PL3429 promoter, Amp <sup>R</sup>                                    | [25]       |
| pL3429-sfGFP | pL0-sfGFP harboring PL3429 promoter, Amp <sup>R</sup>                                    | [25]       |
| pRep1        | pGly-2 harboring PL3429 promoter replace Tet promoter, no TetR, Kan <sup>R</sup>         | This study |
| pRep2        | pGly-2 harboring PL3429 promoter replace Tet promoter, no TetR, no RBS, Kan <sup>R</sup> | This study |
| pRep3        | pGly-2 harboring PL3429 promoter replace Tet promoter, Kan <sup>R</sup>                  | This study |
| pGly3153     | pRep1 harboring PL3153 replace PL3429 promoter, Kan <sup>R</sup>                         | This study |
| pGly1562     | pRep1 harboring PL1562 replace PL3429 promoter, Kan <sup>R</sup>                         | This study |
| pGly3262     | pRep1 harboring PL3262 replace PL3429 promoter, Kan <sup>R</sup>                         | This study |
| pGly2353     | pRep1 harboring PL2353 replace PL3429 promoter, Kan <sup>R</sup>                         | This study |
| pGly3090     | pRep1 harboring PL3090 replace PL3429 promoter, Kan <sup>R</sup>                         | This study |
| pGly2917     | pRep1 harboring PL2917 replace PL3429 promoter, Kan <sup>R</sup>                         | This study |
| pGly3149     | pRep1 harboring PL3149 replace PL3429 promoter, Kan <sup>R</sup>                         | This study |
| pGly3195     | pRep1 harboring PL3195 replace PL3429 promoter, Kan <sup>R</sup>                         | This study |
| pGly2538     | pRep1 harboring PL2538 replace PL3429 promoter, Kan <sup>R</sup>                         | This study |
| pGly1993     | pRep1 harboring PL1993 replace PL3429 promoter, Kan <sup>R</sup>                         | This study |

**Table S2 Primers used in this study**

| <b>Primer</b> | <b>Sequence (5' to 3')</b>                                                   |
|---------------|------------------------------------------------------------------------------|
| pRep1 F       | GAATTGTGAGCGGATACAATTTACGCAGGAAACAAAC<br>CGAGCACCTAGGTTTCTCCATAC             |
| pRep1 R       | CACACACTATACGAGCCGGATGATTAATTGTCAACTCGA<br>GGATAAGCTGTCAAACATGAG             |
| pRep2 F       | GAATTGTGAGCGGATACAATTTACGCAGGAAACAAAC<br>CATGGATATCATCTTTTATCAC              |
| pRep2 R       | CACACACTATACGAGCCGGATGATTAATTGTCAACTCGA<br>GGATAAGCTGTCAAACATGAG             |
| pRep3 F       | GAATTGTGAGCGGATACAATTTACGCAGGAAACAAAC<br>CGAGCACCTAGGTTTCTCCATAC             |
| pRep3 R       | CACACACTATACGAGCCGGATGATTAATTGTCAATTTCT<br>CCTCTTTGCTAGCGTGAAGAC             |
| pGly3429 F    | GAATTGTGAGCGGATACAATTTACGCAGGAAACAAAC<br>CGAATTCCAACGCTTTTCGGG               |
| pGly3429 R    | CACACACTATACGAGCCGGATGATTAATTGTCAACTCGA<br>GGATAAGCTGTCAAACATGA              |
| pGly3153 F    | GAATTGTGAGCAGATAACAATTTACACAGGAAACAGA<br>CCGAATTCCAACGCTTTTCGGGAGTCAGTATG    |
| pGly3153 R    | CACACATTTACGAGCCGGATGATTAATTGTCAACTCGAG<br>GATAAGCTGTCAAACATGAGCAGATCCTCTACG |
| pGly1562 F    | GAATTGTGGGCGGATAAACTTTACACAGGAAACAGA<br>CCGAATTCCAACGCTTTTCGGGAGTC           |
| pGly1562 R    | CGCATACTATACGAGCCGGATGATTAATTGTCAACTCGA                                      |

|            |                                                                               |
|------------|-------------------------------------------------------------------------------|
|            | GGATAAGCTGTCAAACATGAGCAG                                                      |
| pGly3262 F | GAACTGTGGGCGGATACAATTTACACAGGAAACAGAC<br>CGAATTCCAACGCTTTTCGGG                |
| pGly3262 R | CACACATTATACGAGCCGGATGATTAATTGTCAACTCGA<br>GGATAAGCTGTCAAACATGAG              |
| pGly2353 F | GAATTGTGGGCGGATAACAATTTACACAGGAAACAGA<br>CCGAATTCCAACGCTTTTCGGGAGTC           |
| pGly2353 R | CACACATTATACTAGCCGGATGATTAATTGTCAACTCGA<br>GGATAAGCTGTCAAACATGAGCAG           |
| pGly3090 F | GAATTGTGGGCGGATAGCATTTTACACAGGAAACAGAC<br>CGAATTCCAACGCTTTTCGG                |
| pGly3090 R | CACGCATTATACGAGCCGGATGATTAATTGTCAACTCGA<br>GGATAAGCTGTCAAACATGA               |
| pGly2917 F | GAATTGTGAGTGGATAACAATTTACACAGGAAACAGA<br>CCGAATTCCAACGCTTTTCGG                |
| pGly2917 R | CACACATTATACGGGCCGGATGATTAATTGTCAACTCGA<br>GGATAAGCTGTCAAACATGA               |
| pGly3149 F | GAATCGTGAGCGGATACAATTTACACAGGAAACAGAC<br>CGAATTCCAACGCTTTTCGGGAGTCAGTATG      |
| pGly3149 R | CACACATTATACGAGCCGGATGATTAATTGTCAACTCGA<br>GGATAAGCTGTCAAACATGAGCAGATCCTCTACG |
| pGly3195 F | GAATTGCGGGCGGATAACAATTTACACAGGAAACAGA<br>CCGAATTCCAACGCTTTTCGGGAGTCAGTATG     |
| pGly3195 R | CACACATTATAGAGCCGGATGATTAATTGTCAACTCGAG<br>GATAAGCTGTCAAACATGAGCAGATCCTCTACG  |

|                 |                                                                 |
|-----------------|-----------------------------------------------------------------|
| pGly2538 F      | GAATTGTAAGCGGATAACAATTTACACAGGAAAAAGA<br>CCGAATTCCAACGCTTTTCGG  |
| pGly2538 R      | CACACATTATACGAGCCGGATGATTAATTGTCAACTCGA<br>GGATAAGCTGTCAAACATGA |
| pGly1993 F      | GAATTGTGAGTGGATAACAATTTACACAGGAAACAGA<br>CGGAATTCCAACGCTTTTCGG  |
| pGly1993 R      | CACACATTATACGAGCCGGATGATTAATTGTCAACTCGA<br>GGATAAGCTGTCAAACATGA |
| veri-pGly3429 F | CGTATAGTGTGTGGAATTGTGAGCGG                                      |
| veri-pGly3153F  | CGTAAATGTGTGGAATTGTGAG                                          |
| veri-pGly1562 F | CGTATAGTATGCGGAATTGTGGGC                                        |
| veri-pGly3262 F | CGTATAATGTGTGGAAGTGTGGGCGGATAC                                  |
| veri-pGly2353 F | GCTAGTATAATGTGTGGAATTGTGGG                                      |
| veri-pGly3090 F | CGTATAATGCGTGGAATTGTG                                           |
| veri-pGly2917 F | CGTATAATGTGTGGAATTGTGAG                                         |
| veri-pGly3149 F | CGTATAATGTGTGGAATCGTGAG                                         |
| veri-pGly3195 F | CTATAATGTGTGGAATTGCGGG                                          |
| veri-pGly2538 F | CGTATAATGTGTGGAATTGTAAG                                         |
| veri-pGly1993 F | AATGTGTGGAATTGTGAGTGGATAAC                                      |
| veri-ycdW R     | GTTCTTCCCGTCCGGCAAAG                                            |
| q16s F          | TCTTGACATCCACAGAACTT                                            |
| q16s R          | TAACCCAACATTTACAACA                                             |
| qycdw F         | TACCCGTCCCGCTGAAGCTG                                            |
| qycdw R         | ACTTGCCCGCAGACCCTCTC                                            |
| qaceA F         | CGATGCTGATGCGGCGGATC                                            |

|         |                        |
|---------|------------------------|
| qaceA R | ACGGCTGATCGCTTGCTCAATG |
| qaceK F | AAGACGAACTTGCCAGCGAACC |
| qaceK R | GAACAGGTCGGCGTGCATCTC  |

---



**Table S3 Synthetic promoters sequence used in this study**

| Promoter | Sequence (5' to 3')                                                            |
|----------|--------------------------------------------------------------------------------|
| PL3153   | TTGACAATTAATCATCCGGCTCGTAAATGTGTGGAATTG<br>TGAGCAGATAACAATTTACACAGGAAACAGACC   |
| PL3429   | TTGACAATTAATCATCCGGCTCGTATAGTGTGTGGAATT<br>GTGAGCGGATAACAATTTACGCAGGAAACAAACC  |
| PL1562   | TTGACAATTAATCATCCGGCTCGTATAGTATGCGGAATT<br>GTGGGCGGATAACACTTTCACACAGGAAACAGACC |
| PL3262   | TTGACAATTAATCATCCGGCTCGTATAATGTGTGGAATT<br>GTGGGCGGATAACAATTTACACAGGAAACAGACC  |
| PL2353   | TTGACAATTAATCATCCGGCTAGTATAATGTGTGGAATT<br>GTGGGCGGATAACAATTTACACAGGAAACAGACC  |
| PL3090   | TTGACAATTAATCATCCGGCTCGTATAATGCGTGGAATT<br>GTGGGCGGATAGCATTTTACACAGGAAACAGACC  |
| PL2917   | TTGACAATTAATCATCCGGCCCGTATAATGTGTGGAATT<br>GTGAGTGGATAACAATTTACACAGGAAACAGACC  |
| PL3149   | TTGACAATTAATCATCCGGCTCGTATAATGTGTGGAATC<br>GTGAGCGGATAACAATTTACACAGGAAACAGACC  |
| PL3195   | TTGACAATTAATCATCCGGCTCTATAATGTGTGGAATTG<br>CGGGCGGATAACAATTTACACAGGAAACAGACC   |
| PL2538   | TTGACAATTAATCATCCGGCTCGTATAATGTGTGGAATT<br>GTAAGCGGATAACAATTTACACAGGAAAAAGACC  |
| PL1993   | TTGACAATTAATCATCCGGCTCGTATAATGTGTGGAATT<br>GTGAGTGGATAACAATTTACACAGGAAACAGACG  |

**Table S4 The transcription levels of *aceK*, *aceA* and *ycdW* genes in Mgly4T and Mrep1(Mgly4T3429).**

| Strains | <i>ycdW</i> | <i>aceA</i> | <i>aceK</i> |
|---------|-------------|-------------|-------------|
| Mgly4T  | 0.86        | 2.98        | 3.2         |
| Mrep1   | 0.72        | 3.17        | 5           |

Note: strain Mgly4 was used as the control.

**Table S5 The transcription levels of *aceK*, *aceA* and *ycdW* genes in different strains.**

| Strains           | <i>ycdW</i> | <i>aceA</i> | <i>aceK</i> |
|-------------------|-------------|-------------|-------------|
| Mgly4T3153        | 1.38        | 0.82        | 0.77        |
| Mrep1(Mgly4T3429) | 0.72        | 3.17        | 5           |
| Mgly4T1562        | 0.26        | 2.78        | 3.79        |
| Mgly4T3262        | 0.31        | 2.77        | 5.5         |
| Mgly4T2353        | 1.71        | 4.44        | 5.62        |
| Mgly4T3090        | 0.61        | 2.26        | 3.23        |
| Mgly4T2917        | 0.27        | 2.47        | 3.87        |
| Mgly4T3149        | 2.59        | 2.55        | 0.11        |
| Mgly4T3195        | 2.33        | 0.55        | 1.12        |
| Mgly4T2538        | 1.08        | 1.39        | 2.49        |
| Mgly4T1993        | 0.7         | 2.3         | 3.72        |

Note: strain Mgly4 was used as the control.

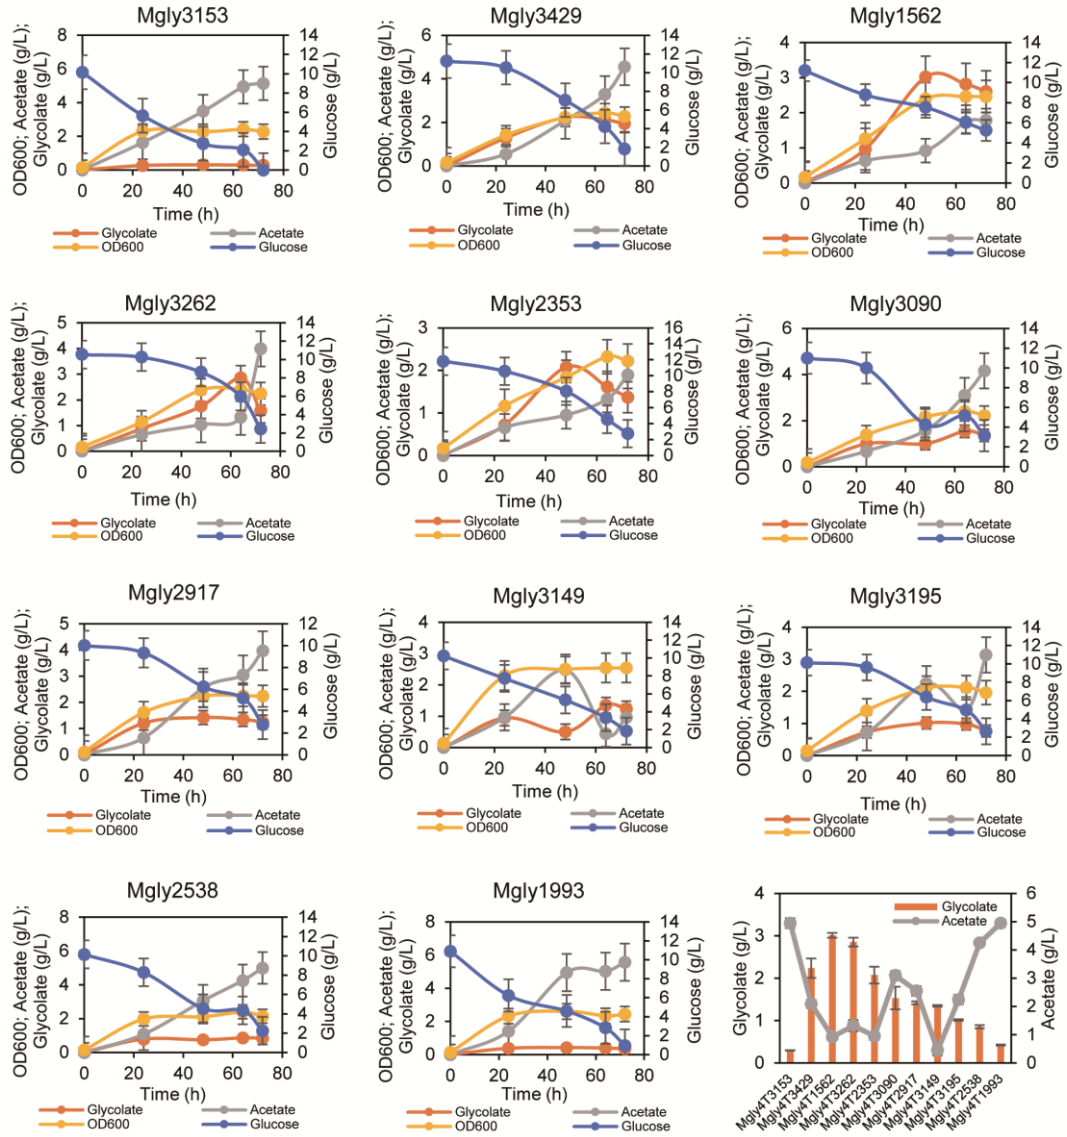

Figure S1 Cultivation process of strain *Mgly4T*3153, *Mgly4T*3429, *Mgly4T*1562, *Mgly4T*3262, *Mgly4T*2353, *Mgly4T*3090, *Mgly4T*2917, *Mgly4T*3149, *Mgly4T*3195, *Mgly4T*2538, *Mgly4T*1993 and comparison of the highest glycolate and acetate titer.
